# Supplementary material for: Salt and Metal Tolerance Involves Formation of Guttation Droplets in Species of the Aspergillus versicolor Complex
Source: MDPI journal article supplement (doi:10.3390/genes13091631), 2022-09-11
Supplement: s1 [file s1]

## Supplemental Material

**Suppl. Table S1:** Element and ion concentrations at three sampling sites along the contamination gradient (compare Figure 1 in main text).

| µg/g    | Sr                 | Cs                | Fe                 | Mn               | Cd             | Cu             | Ni             | Zn           | F <sup>-</sup> | Cl <sup>-</sup>     | SO <sub>4</sub> <sup>2-</sup> |
|---------|--------------------|-------------------|--------------------|------------------|----------------|----------------|----------------|--------------|----------------|---------------------|-------------------------------|
| Low     | 9.90<br>±<br>0.07  | 0.17<br>±<br>0.00 | 1.60<br>±<br>0.10  | 484<br>±<br>3.13 | 0.17<br>± 0.01 | 0.96<br>± 0.00 | 6.90<br>± 0.14 | 32.34 ± 0.20 | 260<br>± 10    | 87,800 ±<br>300     | 134,900<br>± 500              |
| Interm. | 25.01<br>±<br>0.03 | 7.47<br>±<br>0.05 | 1.40<br>±<br>0.20  | 669<br>±<br>14.1 | 0.96<br>± 0.04 | 3.61<br>± 0.05 | 15.80 ± 0.32   | 44.50 ± 0.32 | 1,030<br>± 10  | 780,000<br>± 1000   | 781,000<br>± 10000            |
| High    | 33.15<br>±<br>0.07 | 4.03<br>±<br>0.00 | 17.50<br>±<br>0.10 | 210<br>±<br>2.19 | 0.19<br>± 0.01 | 3.46<br>± 0.07 | 2.91<br>± 0.06 | 22.59 ± 0.08 | 1,810<br>± 10  | 1,037,000<br>± 5000 | 5,535,000 ±<br>27000          |

**Suppl. Table S2:** Growth of fungal isolates on media containing salt or heavy metals.

| Isolate |                                | acc. no.   | NaCl 20 % | 100 mM<br>SrCl <sub>2</sub> | 100 mM<br>CsCl | 100 mM<br>Cs <sub>2</sub> SO <sub>4</sub> |
|---------|--------------------------------|------------|-----------|-----------------------------|----------------|-------------------------------------------|
| SF120   | <i>Cephalotrichum</i> sp.      | OL685265.1 | na        | -                           | -              | -                                         |
| SFA45   | <i>Gliomastix</i> sp.          | OL685269.1 | na.       | +                           | -              | -                                         |
| SFA57   | <i>Cordyceps</i> sp.           | OL681895.1 | na.       | +                           | +              | +                                         |
| SFB2    | <i>Penicillium</i> sp.         | OL685268.1 | na.       | +                           | -              | -                                         |
| SFB17   | <i>Pseudogymnoascus</i><br>sp. | OL685264.1 | na.       | -                           | -              | -                                         |
| SFB31   | <i>Aspergillus</i> sp.         | ON231809   | +         | +                           | +              | +                                         |
| SFB32   | <i>Aspergillus</i> sp.         | ON231808   | +         | +                           | +              | +                                         |
| SFB57   | <i>Gaeumannomyces</i> sp.      | OL685270.1 | na        | -                           | -              | -                                         |
| SFB84   | <i>Aspergillus</i> sp.         | ON231807   | +         | +                           | +              | +                                         |

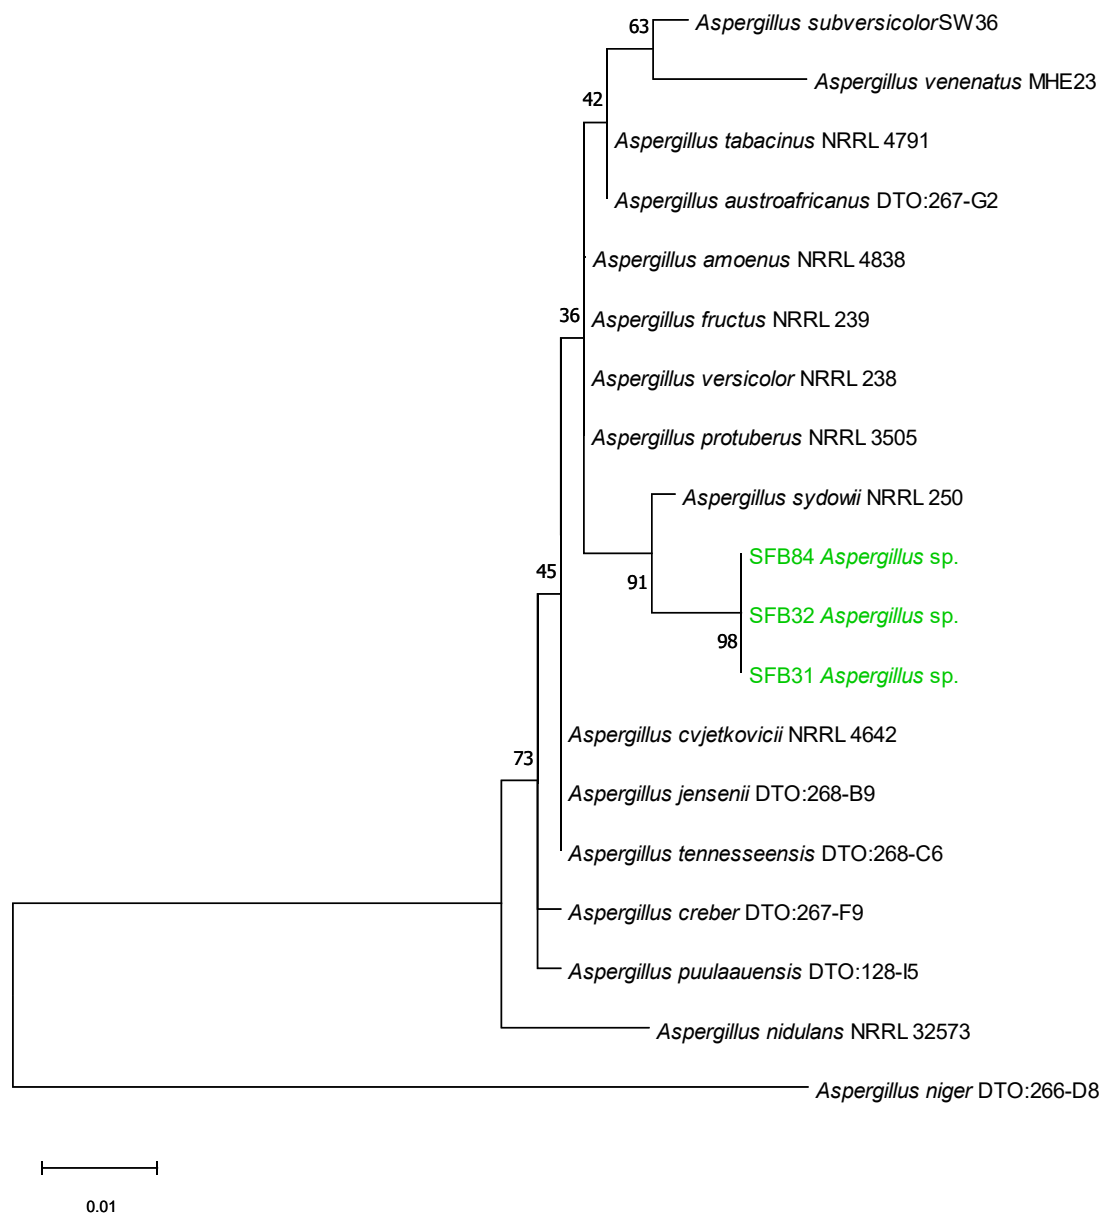

**Suppl. Figure S1:** Phylogenetic association of three salt and metal resistant isolates within the *A. versicolor* clade. Comparison with sequences retrieved from Genbank was used with accession numbers: *A. subversicolor* MH469528.1, *A. venenatus* MK140703.1, *A. austroafricanus* KJ775458.1, *A. tabacinus* EF652478.1, *A. amoenus* EF652480.1, *A. fructus* EF652449.1, *A. protuberus* EF652460.1, *A. versicolor* EF652442.1, *A. sydowii* EF652450.1, SFB84 *Aspergillus* sp. ON231807, SFB32 *Aspergillus* sp. ON231808, SFB31 *Aspergillus* sp. ON231809, *A. cvjetkovicii* EF652467.1, *A. jensenii* KJ775496.1, *A. tennesseensis* KJ775578.1, *A. creber* KJ775474.1, *A. puulaauensis* KJ775532.1, *A. nidulans* EF652458.1 and *A. niger* KJ775512.1 as outgroup. This analysis involved 19 nucleotide sequences; bootstrap values are given at each branch.

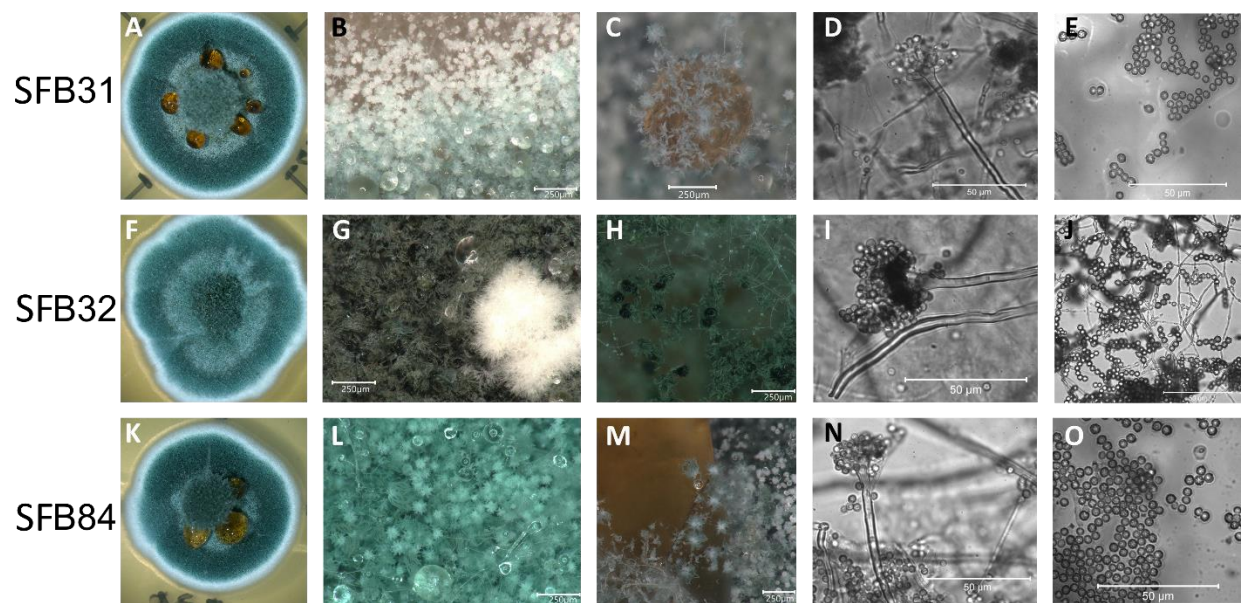

**Suppl. Figure S2:** Morphological characterization of *Aspergillus* sp. SFB31 (A-E), SFB32 (F-J) and SFB84 (K-O). Growth was checked on ME agar macroscopically (A, F, K), microscopically (B, G, L; bar 250 µm) with penicillate conidiophores (C, H, M; bar 250 µm) with a smooth stipe and subglobose vesicle (D, I, N; bar 50 µm) and subglobose-spinulose conidia (E, J, O; bar 50 µm).

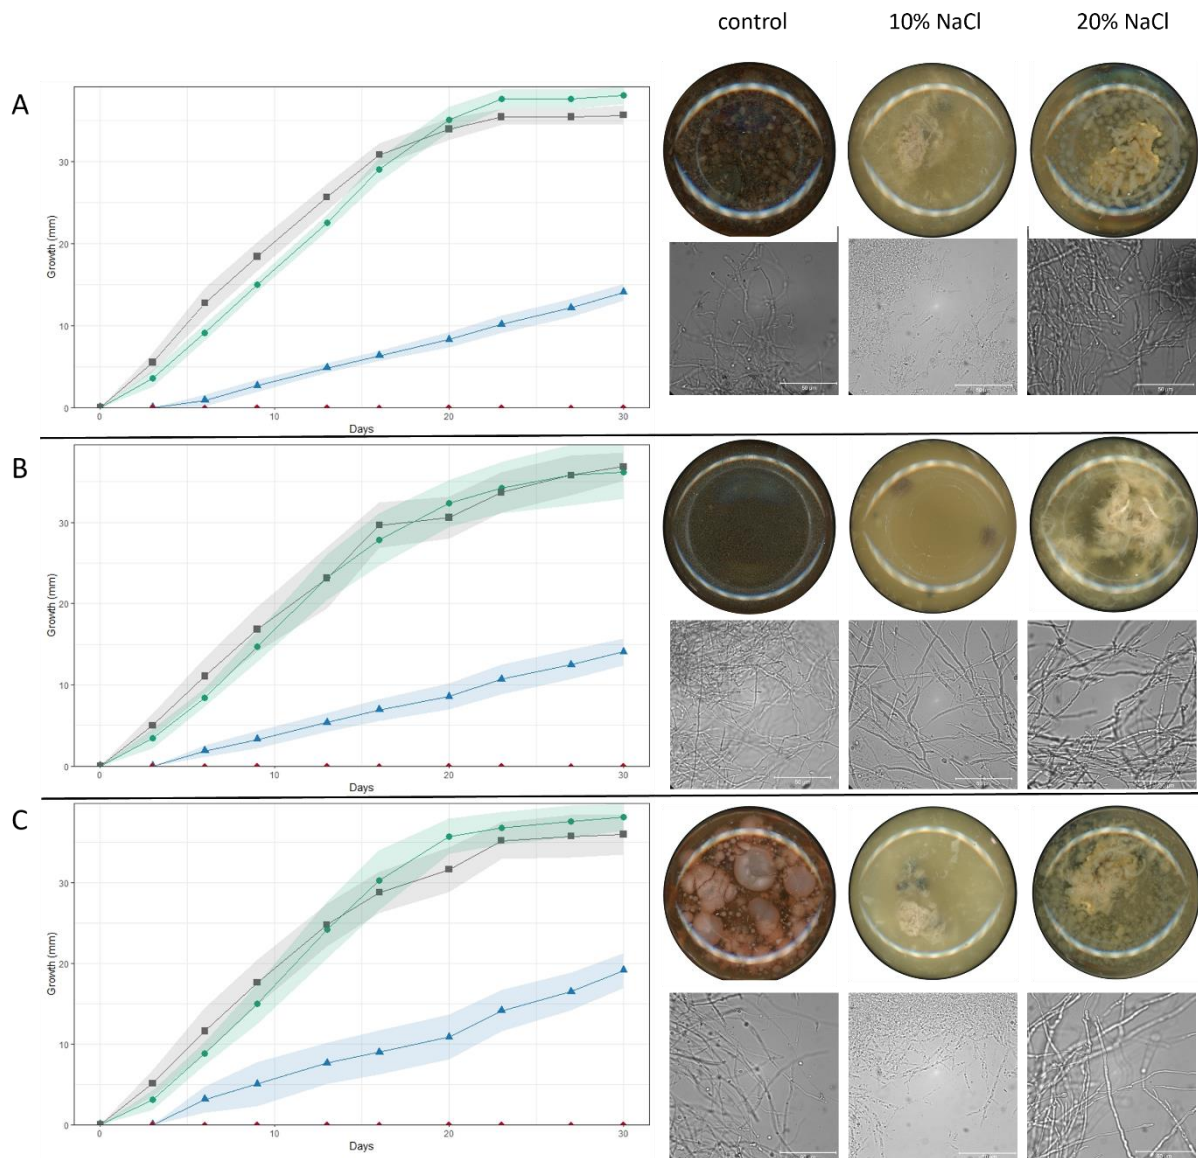

**Suppl. Figure S3:** Growth of *Aspergillus* sp. SFB31 (A), SFB32 (B) and SFB84 (C) on 10% NaCl (green, circles), 20% NaCl (blue, triangles) and lack of growth with 30% NaCl (red, small triangles) compared to medium without salt addition (grey, squares). The shaded area shows standard deviations. The inserts on the right show growth pattern in liquid media and microscopical features of the cultures; scale bar = 50  $\mu$ m.

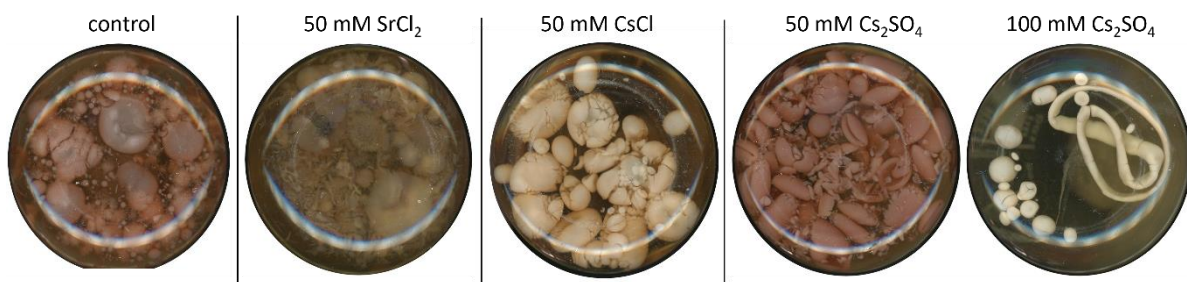

**Suppl. Figure S4:** Mycelial agglomeration and pigmentation changes observed in liquid cultures grown in the presence of Cs and Sr salts of *Aspergillus* sp. SFB 31. Similar appearances were observed for the other strains.

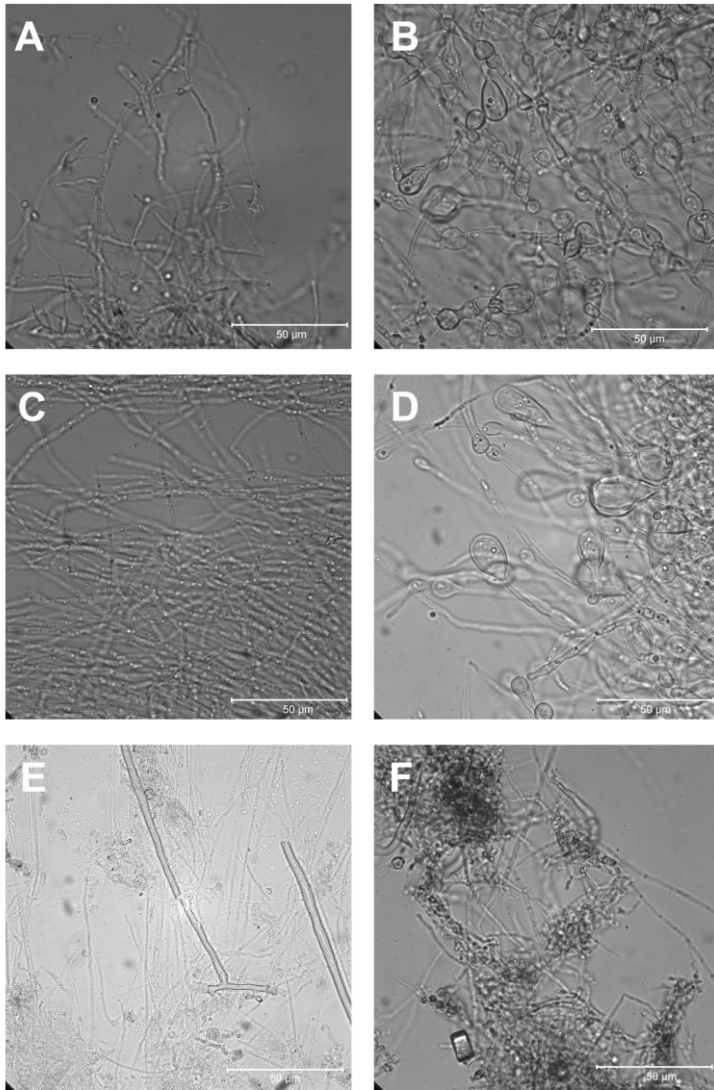

**Suppl. Figure S5:** Hyphal morphology changes with Cs or Sr salts shown for *Aspergillus* sp. representative of all three strains. (A) Control without metal salt; (B) grown with CsCl; (C, D) growth with Cs<sub>2</sub>SO<sub>4</sub>; (E, F) with SrCl<sub>2</sub>; scale bar = 50 μm.



**Supp. Table S3:** Significant changed proteins in the guttation proteomes of *Aspergillus* sp. cultivated without and with Sr.

| acc. no.                     | closest hit                                          | log 2-fold change | p-value |
|------------------------------|------------------------------------------------------|-------------------|---------|
| <i>Aspergillus</i> sp. SFB31 |                                                      |                   |         |
| BCS23749                     | hypothetical protein APUU_40193A                     | -24.90            | 0.035   |
| BCS23750                     | hypothetical protein APUU_40194S                     | -23.32            | 0.002   |
| BCS26750                     | hypothetical protein APUU_51461S                     | -20.03            | 0.000   |
| BCS25562                     | hypothetical protein APUU_50273S                     | -19.02            | 0.001   |
| BCS24578                     | hypothetical protein APUU_41022S                     | -18.64            | 0.002   |
| BCS21543                     | hypothetical protein APUU_21975A                     | -18.55            | 0.000   |
| BCS24293                     | 1.3-beta-glucanosyltransferase gas1                  | -18.50            | 0.001   |
| BCS22506                     | hypothetical protein APUU_30731A                     | -18.31            | 0.002   |
| BCS21923                     | hypothetical protein APUU_30148A                     | -17.74            | 0.004   |
| BCS30503                     | hypothetical protein APUU_80806S                     | -17.49            | 0.001   |
| BCS25714                     | hypothetical protein APUU_50425S                     | -17.26            | 0.000   |
| BCS25653                     | 40S ribosomal protein S23                            | -17.13            | 0.005   |
| BCS22045                     | hypothetical protein APUU_30270S                     | -16.93            | 0.001   |
| BCS27517                     | homocysteine synthase                                | -16.89            | 0.001   |
| BCS18797                     | NADH-cytochrome b5 reductase                         | -14.11            | 0.000   |
| BCS22168                     | hypothetical protein APUU_30393A                     | -14.11            | 0.000   |
| BCS24140                     | phosphatidylinositol transfer protein csr1           | -14.11            | 0.000   |
| BCS24318                     | cytosolic leucyl tRNA synthetase                     | -14.11            | 0.000   |
| BCS24561                     | alpha.alpha-trehalase nth1                           | -14.11            | 0.000   |
| BCS24728                     | proteasome subunit beta type-7                       | -14.11            | 0.000   |
| BCS24931                     | eisosome core component                              | -14.11            | 0.000   |
| BCS25097                     | hypothetical protein APUU_41541S                     | -14.11            | 0.000   |
| BCS26593                     | hypothetical protein APUU_51304A                     | -14.11            | 0.000   |
| BCS28866                     | 60S ribosomal protein L25                            | -14.11            | 0.000   |
| BCS26130                     | hypothetical protein APUU_50841A                     | -13.10            | 0.043   |
| BCS20605                     | hypothetical protein APUU_21037S                     | -13.08            | 0.047   |
| <i>Aspergillus</i> sp. SFB32 |                                                      |                   |         |
| BCS26731                     | hypothetical protein APUU_51442A                     | -26.64            | 0.010   |
| BCS19064                     | hypothetical protein APUU_11892S                     | -25.73            | 0.003   |
| BCS25989                     | hypothetical protein APUU_50700A                     | -25.08            | 0.001   |
| BCS21491                     | 1.3-beta-glucanosyltransferase gas1                  | -24.86            | 0.001   |
| BCS25153                     | hypothetical protein APUU_41597S                     | -24.15            | 0.002   |
| BCS30447                     | hypothetical protein APUU_80750A                     | -24.09            | 0.002   |
| BCS19059                     | superoxide dismutase [Cu-Zn]                         | -23.46            | 0.002   |
| BCS20958                     | hypothetical protein APUU_21390A                     | -23.30            | 0.002   |
| BCS23143                     | hypothetical protein APUU_31368S                     | -23.29            | 0.004   |
| BCS22535                     | ADP-ribosylation factor. Arf Arf6                    | -23.08            | 0.001   |
| BCS26183                     | 40S ribosomal protein S22                            | -23.04            | 0.002   |
| BCS27040                     | hypothetical protein APUU_60088A                     | -23.02            | 0.001   |
| BCS19295                     | hypothetical protein APUU_12123S                     | -22.82            | 0.001   |
| BCS22570                     | hypothetical protein APUU_30795S                     | -22.52            | 0.001   |
| BCS29474                     | eukaryotic translation initiation factor 3 subunit A | -22.48            | 0.001   |
| BCS21923                     | hypothetical protein APUU_30148A                     | -22.47            | 0.001   |
| BCS17732                     | hypothetical protein APUU_10560S                     | -20.08            | 0.000   |
| BCS18328                     | hypothetical protein APUU_11156A                     | -20.08            | 0.000   |
| BCS20038                     | hypothetical protein APUU_20470A                     | -20.08            | 0.000   |
| BCS20295                     | hypothetical protein APUU_20727S                     | -20.08            | 0.000   |
| BCS20538                     | hypothetical protein APUU_20970A                     | -20.08            | 0.000   |
| BCS20553                     | translation termination factor GTPase eRF3           | -20.08            | 0.000   |

|                              |                                                 |        |       |
|------------------------------|-------------------------------------------------|--------|-------|
| BCS21228                     | protein phosphatase 2A regulatory subunit cdc55 | -20.08 | 0.000 |
| BCS25109                     | H(+)-transporting V1 sector ATPase subunit A    | -20.08 | 0.000 |
| BCS25772                     | hypothetical protein APUU_50483S                | -20.08 | 0.000 |
| BCS26240                     | hypothetical protein APUU_50951S                | -20.08 | 0.000 |
| BCS26729                     | hypothetical protein APUU_51440S                | -20.08 | 0.000 |
| BCS28879                     | cytosolic seryl-tRNA synthetase                 | -20.08 | 0.000 |
| BCS30512                     | hypothetical protein APUU_80815A                | -13.77 | 0.030 |
| BCS22440                     | hypothetical protein APUU_30666S                | -13.72 | 0.036 |
| <i>Aspergillus</i> sp. SFB84 |                                                 |        |       |
| BCS21491                     | 1.3-beta-glucanosyltransferase gas1             | -27.55 | 0.002 |
| BCS30737                     | hypothetical protein APUU_81040S                | -27.35 | 0.019 |
| BCS20120                     | hypothetical protein APUU_20552S                | -26.71 | 0.001 |
| BCS30447                     | hypothetical protein APUU_80750A                | -26.04 | 0.002 |
| BCS24469                     | basic amino-acid permease                       | -25.61 | 0.009 |
| BCS24974                     | hypothetical protein APUU_41418S                | -25.24 | 0.002 |
| BCS21890                     | putative dipeptidyl-peptidase 5                 | -24.76 | 0.009 |
| BCS22373                     | hypothetical protein APUU_30598A                | -24.59 | 0.011 |
| BCS19751                     | hypothetical protein APUU_20183S                | -24.41 | 0.001 |
| BCS24945                     | hypothetical protein APUU_41389S                | -24.10 | 0.000 |
| BCS22082                     | hypothetical protein APUU_30307S                | -24.08 | 0.013 |
| BCS29145                     | putative glycosidase Crf2                       | -23.84 | 0.001 |
| BCS28579                     | hypothetical protein APUU_70149A                | -23.77 | 0.000 |
| BCS18737                     | hypothetical protein APUU_11565S                | -23.51 | 0.007 |
| BCS24750                     | hypothetical protein APUU_41194S                | -23.46 | 0.011 |
| BCS19033                     | hypothetical protein APUU_11861S                | -23.42 | 0.004 |
| BCS17444                     | hypothetical protein APUU_10272S                | -23.24 | 0.003 |
| BCS22691                     | nuclear transport factor 2                      | -23.16 | 0.002 |
| BCS23179                     | mannan endo-1.4-beta-mannosidase A-1            | -23.06 | 0.005 |
| BCS23865                     | hypothetical protein APUU_40309S                | -22.99 | 0.004 |
| BCS23143                     | hypothetical protein APUU_31368S                | -22.83 | 0.003 |
| BCS28582                     | hypothetical protein APUU_70152A                | -22.75 | 0.000 |
| BCS20958                     | hypothetical protein APUU_21390A                | -22.41 | 0.009 |
| BCS25153                     | hypothetical protein APUU_41597S                | -22.31 | 0.015 |
| BCS23567                     | hypothetical protein APUU_40011A                | -22.08 | 0.001 |
| BCS29210                     | hypothetical protein APUU_70780A                | -21.97 | 0.014 |
| BCS17456                     | hypothetical protein APUU_10284S                | -21.88 | 0.042 |
| BCS28273                     | hypothetical protein APUU_61321S                | -21.76 | 0.006 |
| BCS19957                     | hypothetical protein APUU_20389A                | -21.40 | 0.011 |
| BCS29737                     | hypothetical protein APUU_80040A                | -21.27 | 0.010 |
| BCS22280                     | hypothetical protein APUU_30505S                | -21.20 | 0.002 |
| BCS23388                     | hypothetical protein APUU_31613S                | -21.10 | 0.009 |
| BCS21809                     | hypothetical protein APUU_30034A                | -21.09 | 0.002 |
| BCS25670                     | hypothetical protein APUU_50381S                | -21.08 | 0.027 |
| BCS20939                     | hypothetical protein APUU_21371S                | -21.02 | 0.008 |
| BCS26753                     | hypothetical protein APUU_51464S                | -21.02 | 0.003 |
| BCS26773                     | type I transmembrane sorting receptor           | -20.73 | 0.008 |
| BCS20778                     | hypothetical protein APUU_21210A                | -20.71 | 0.014 |
| BCS21864                     | alpha-glucosidase mal12                         | -20.70 | 0.005 |
| BCS25729                     | hypothetical protein APUU_50440S                | -20.70 | 0.003 |
| BCS20910                     | tannase and feruloyl esterase                   | -20.56 | 0.003 |
| BCS19728                     | hypothetical protein APUU_20160A                | -20.52 | 0.006 |
| BCS21923                     | hypothetical protein APUU_30148A                | -20.48 | 0.008 |
| BCS30334                     | hypothetical protein APUU_80637A                | -20.46 | 0.016 |
| BCS30755                     | hypothetical protein APUU_81058A                | -20.42 | 0.025 |

|          |                                                                                               |        |       |
|----------|-----------------------------------------------------------------------------------------------|--------|-------|
| BCS24865 | glucose-repressible protein                                                                   | -20.42 | 0.034 |
| BCS20392 | hypothetical protein APUU_20824S                                                              | -20.41 | 0.010 |
| BCS24325 | adenosine 5'-monophosphoramidase                                                              | -20.33 | 0.008 |
| BCS20233 | hypothetical protein APUU_20665A                                                              | -20.30 | 0.005 |
| BCS22535 | ADP-ribosylation factor. Arf Arf6                                                             | -20.27 | 0.004 |
| BCS25033 | hypothetical protein APUU_41477A                                                              | -20.24 | 0.000 |
| BCS23938 | hypothetical protein APUU_40382S                                                              | -20.24 | 0.003 |
| BCS27802 | hypothetical protein APUU_60850A                                                              | -20.17 | 0.009 |
| BCS19674 | hypothetical protein APUU_20106A                                                              | -20.01 | 0.008 |
| BCS21020 | hypothetical protein APUU_21452A                                                              | -19.99 | 0.003 |
| BCS24941 | hypothetical protein APUU_41385A                                                              | -19.95 | 0.003 |
| BCS28320 | hypothetical protein APUU_61368A                                                              | -19.91 | 0.010 |
| BCS24591 | hypothetical protein APUU_41035A                                                              | -19.89 | 0.004 |
| BCS28331 | hypothetical protein APUU_61379S                                                              | -19.72 | 0.005 |
| BCS24141 | copper transporter integral membrane protein that functions in high affinity copper transport | -19.71 | 0.015 |
| BCS19750 | hypothetical protein APUU_20182S                                                              | -19.69 | 0.021 |
| BCS19734 | hypothetical protein APUU_20166A                                                              | -19.61 | 0.028 |
| BCS19295 | hypothetical protein APUU_12123S                                                              | -19.55 | 0.008 |
| BCS21413 | hypothetical protein APUU_21845A                                                              | -19.51 | 0.011 |
| BCS25556 | hypothetical protein APUU_50267S                                                              | -19.35 | 0.007 |
| BCS17725 | nascent polypeptide-associated complex subunit beta                                           | -19.21 | 0.011 |
| BCS21189 | hypothetical protein APUU_21621A                                                              | -18.99 | 0.014 |
| BCS22205 | hypothetical protein APUU_30430A                                                              | -18.77 | 0.001 |
| BCS23892 | eukaryotic translation initiation factor 5A                                                   | -18.57 | 0.008 |
| BCS21972 | hypothetical protein APUU_30197S                                                              | -18.54 | 0.021 |
| BCS29474 | eukaryotic translation initiation factor 3 subunit A                                          | -18.49 | 0.000 |
| BCS25989 | hypothetical protein APUU_50700A                                                              | -18.03 | 0.000 |
| BCS17599 | hypothetical protein APUU_10427S                                                              | -16.06 | 0.000 |
| BCS17912 | hypothetical protein APUU_10740S                                                              | -16.06 | 0.000 |
| BCS18110 | putative lipase Atg15                                                                         | -16.06 | 0.000 |
| BCS19026 | delta subunit of the central stalk of mitochondrial F1F0 ATP synthase. atp16                  | -16.06 | 0.000 |
| BCS19241 | hypothetical protein APUU_12069S                                                              | -16.06 | 0.000 |
| BCS19766 | hypothetical protein APUU_20198S                                                              | -16.06 | 0.000 |
| BCS20084 | hypothetical protein APUU_20516S                                                              | -16.06 | 0.000 |
| BCS20553 | translation termination factor GTPase eRF3                                                    | -16.06 | 0.000 |
| BCS20723 | proteasome subunit alpha type-2                                                               | -16.06 | 0.000 |
| BCS23246 | hypothetical protein APUU_31471A                                                              | -16.06 | 0.000 |
| BCS23424 | hypothetical protein APUU_31649A                                                              | -16.06 | 0.000 |
| BCS24522 | H(+)-transporting V0 sector ATPase subunit a                                                  | -16.06 | 0.000 |
| BCS24639 | acyl carrier protein. mitochondrial                                                           | -16.06 | 0.000 |
| BCS25733 | hypothetical protein APUU_50444S                                                              | -16.06 | 0.000 |



**Suppl. Table S4:** Significantly changed identified metabolites (growth with and without Sr, cut-off = 5 for log2-fold change) in the guttation proteomes of *Aspergillus* sp.

| Name             | Formula                                                                                    | Calc. MW | $\Delta$<br>[ppm] | Ret.<br>[min] | log 2-fold change in <i>Aspergillus</i> sp. |       |       |
|------------------|--------------------------------------------------------------------------------------------|----------|-------------------|---------------|---------------------------------------------|-------|-------|
|                  |                                                                                            |          |                   |               | B31                                         | B32   | B84   |
|                  | C <sub>76</sub> H <sub>95</sub> N <sub>10</sub> O <sub>17</sub> P <sub>3</sub>             | 1512.61  | -0.09             | 2.982         | -9.46                                       | -6.5  | -5.77 |
|                  | C <sub>12</sub> H <sub>22</sub> N <sub>3</sub> P <sub>3</sub>                              | 301.10   | 3.02              | 3.725         | -9.12                                       | -8.99 | 7.9   |
|                  | C <sub>19</sub> H <sub>32</sub> O S                                                        | 308.22   | -1.57             | 3.796         | -8.5                                        | -7.83 | 6.36  |
|                  | C H <sub>4</sub> O <sub>5</sub> P <sub>2</sub>                                             | 157.95   | -3.83             | 3.547         | -7.98                                       | -4.92 | 8.59  |
|                  | C <sub>18</sub> H <sub>8</sub> O S                                                         | 272.03   | -1.28             | 3.856         | -5.59                                       | -5.99 | -6.94 |
|                  | C <sub>9</sub> H <sub>25</sub> N <sub>2</sub> O <sub>3</sub> P <sub>3</sub>                | 302.11   | -2.31             | 3.727         | -5.55                                       | -7.4  | 5.33  |
|                  | C <sub>16</sub> H <sub>26</sub> N <sub>3</sub> P <sub>3</sub>                              | 353.13   | -5.19             | 3.741         | -5.21                                       | -8.53 | 5.99  |
|                  | C <sub>8</sub> H <sub>3</sub> N <sub>2</sub> O <sub>11</sub> P <sub>3</sub>                | 395.90   | 0.12              | 0.607         | -5.01                                       | -5.65 | -6.35 |
|                  | C <sub>13</sub> H <sub>26</sub> N P S                                                      | 259.15   | -3.11             | 2.202         | 5.26                                        | 6.67  | 8.69  |
|                  | C <sub>6</sub> H <sub>3</sub> N <sub>8</sub> O <sub>2</sub> P <sub>3</sub>                 | 311.96   | -2.82             | 0.642         | 5.4                                         | 6.67  | 7.74  |
|                  | C <sub>9</sub> H N O <sub>3</sub> P <sub>2</sub>                                           | 232.94   | -1.32             | 0.63          | 5.49                                        | 7.4   | 7.57  |
| Leucyl-Proline   | C <sub>11</sub> H <sub>20</sub> N <sub>2</sub> O <sub>3</sub>                              | 228.15   | -1.49             | 2.434         | 5.9                                         | 7.26  | 8     |
| Diphenyl ether   | C <sub>12</sub> H <sub>10</sub> O                                                          | 170.07   | 3.21              | 0.588         | 6.11                                        | 6.7   | 7.62  |
| D-Glucosaminide  | C <sub>18</sub> H <sub>35</sub> N <sub>3</sub> O <sub>13</sub>                             | 501.22   | -1.2              | 0.575         | 6.32                                        | 8.81  | 10.04 |
|                  | C <sub>45</sub> H <sub>84</sub> N <sub>5</sub> O <sub>16</sub> P <sub>3</sub>              | 1043.51  | 0                 | 2.822         | 6.35                                        | 9.99  | 7.56  |
| Fortimicin FU-10 | C <sub>12</sub> H <sub>24</sub> N <sub>2</sub> O <sub>9</sub>                              | 340.15   | -1.45             | 0.588         | 6.39                                        | 7.01  | 7.69  |
|                  | C <sub>5</sub> H Cl <sub>2</sub> O P <sub>3</sub> S                                        | 271.83   | 2.19              | 0.618         | 8.03                                        | 8.04  | 8.94  |
|                  | C <sub>5</sub> H N <sub>4</sub> O <sub>5</sub> P <sub>3</sub> S <sub>2</sub>               | 353.86   | 4.31              | 0.591         | 8.15                                        | 9.49  | 9.85  |
|                  | C H <sub>2</sub> Cl <sub>3</sub> O P S <sub>3</sub>                                        | 261.81   | -5.36             | 0.639         | 8.19                                        | 8.85  | 9.93  |
|                  | C <sub>3</sub> H N O <sub>14</sub> P <sub>2</sub>                                          | 336.89   | 1.43              | 0.592         | 9.22                                        | 9.17  | 9.33  |
|                  | C <sub>2</sub> H <sub>3</sub> N <sub>4</sub> O <sub>8</sub> P <sub>3</sub> S               | 335.89   | -0.52             | 0.592         | 9.23                                        | 10.05 | 9.26  |
|                  | C <sub>10</sub> H <sub>2</sub> N <sub>2</sub> O <sub>9</sub> P <sub>2</sub> S <sub>5</sub> | 515.78   | -0.27             | 0.587         | 9.43                                        | 9.47  | 9.65  |

Calc. MW, calculated molecular mass;  $\Delta$ , annotated delta of mass measured, Ret., retention time
